# Supplementary material for: Dynamic connectivity and the effects of maturation in youth with attention deficit hyperactivity disorder
Source: PubMed Central journal article supplement (PMC6372020; doi:10.1162/netn_a_00063), 2018-12-01

**Supplementary Table 1**

| IN Group              | Native Space |                  |                 | Meta-State Space |                 |         |                   |
|-----------------------|--------------|------------------|-----------------|------------------|-----------------|---------|-------------------|
|                       | Dwell Time   | Fraction of Time | State-switching | Number of states | State-switching | L1 Span | Total L1 Distance |
| Global                | 0.210-0.354  | 0.870            | 0.230           | 0.030            | 0.060           | 0.020   | 0.093             |
| Task-positive Control | 0.060-0.765  | 0.353-0.852      | 0.229           | 0.063            | 0.054           | 0.110   | 0.059             |
| DMN                   | 0.007-0.961  | 0.132-0.957      | 0.297           | 0.417            | 0.354           | 0.306   | 0.322             |
| Subcortical           | 0.276-0.838  | 0.787            | 0.946           | 0.307            | 0.256           | 0.835   | 0.429             |
| Visual                | 0.219-0.985  | 0.652-0.890      | 0.708           | 0.703            | 0.718           | 0.233   | 0.530             |
| Sensorimotor          | 0.062-0.875  | 0.738            | 0.136           | 0.629            | 0.874           | 0.446   | 0.155             |
| Cognitive Processing  | 0.343-0.921  | 0.779            | 0.674           | 0.897            | 0.849           | 0.866   | 0.235             |

**Table 1: Global and local intra-system dynamic fluidity and range measures in subjects with ADHD and TD**

Statistical significance level (p-value or  $\alpha$ -value) is displayed for differences in ADHD>TD for each measure of fluid dynamism in the 5-cluster analyses for global and within-system, network groupings. These values represent results obtained in the subsample of 444 youth, matched for motion (DVARs), after variance attributable to age was removed using the general linear model. Significant ( $p < 0.05$  or  $\alpha < 0.05$ , corrected for FDR) differences are highlighted in blue (ADHD<TD) and red (ADHD>TD). Dwell time and fraction of time p-values are shown in a range where applicable, indicating the lowest and highest p-values in all 5 states. The DMN was the only system in which dwell time was significant, in only one state represented by the specific lower bound p-value shown.

## Supplementary Table 2

| IN Groups                          | Native Space |                  |                   | Meta-State Space |                 |         |                   |
|------------------------------------|--------------|------------------|-------------------|------------------|-----------------|---------|-------------------|
|                                    | Dwell Time   | Fraction of Time | State transitions | Number of states | State-switching | L1 Span | Total L1 Distance |
| <b>DMN x Task-positive control</b> | 0.287-0.924  | 0.873            | 0.119             | 0.040            | 0.036           | 0.128   | 0.229             |
| <b>DMN x Sensorimotor</b>          | 0.143-0.813  | 0.644            | 0.786             | 0.300            | 0.400           | 0.931   | 0.462             |
| <b>DMN x Visual</b>                | 0.283-0.969  | 0.883            | 0.986             | 0.534            | 0.554           | 0.963   | 0.373             |
| <b>DMN x Subcortical</b>           | 0.097-0.788  | 0.734-0.963      | 0.034             | 0.627            | 0.428           | 0.165   | 0.807             |
| <b>DMN x Cognitive Processing</b>  | 0.354-0.874  | 0.587            | 0.495             | 0.939            | 0.954           | 0.645   | 0.604             |

**Table 2: Local DMN inter-system dynamic fluidity and range measures in subjects with ADHD and TD**

Statistical significance level (p-value or  $\alpha$ -value) is displayed for differences in ADHD>TD for each measure of fluid dynamism in the 5-cluster analyses for cross-system grouping between the DMN group and every other network group. All values represent 2-sample t-tests performed at  $p < 0.05$  or  $\alpha < 0.05$ , corrected for FDR. These values represent results obtained in the subsample of 444 youth, matched for motion (DVARs), after variance attributable to age was removed using the general linear model. Significant ( $p < 0.05$  or  $\alpha < 0.05$ , corrected for FDR) differences are highlighted in red (ADHD>TD). Dwell time and fraction of time values are shown in a range where applicable, indicating the lowest and highest bounds for each of the 5 states.

### Supplementary Table 3

The following is a list of subjects included in the study, with their ID codes as given in the ADHD-200 repository.

Typically-developing:

|       |       |         |         |         |         |         |
|-------|-------|---------|---------|---------|---------|---------|
| 10006 | 16008 | 25013   | 1842819 | 2558999 | 3385520 | 5600820 |
| 10009 | 16009 | 1000804 | 1849382 | 2559537 | 3434578 | 5669389 |
| 10010 | 16010 | 1018959 | 1854691 | 2572285 | 3473830 | 6187322 |
| 10021 | 16012 | 1043241 | 1854959 | 2618929 | 3494778 | 6346605 |
| 10023 | 16021 | 1050345 | 1875084 | 2640795 | 3554582 | 6477085 |
| 10024 | 16026 | 1050975 | 1875711 | 2641332 | 3562883 | 6550938 |
| 10036 | 16027 | 1056121 | 1879542 | 2659769 | 3593327 | 7011503 |
| 10039 | 16028 | 1093743 | 1884448 | 2703336 | 3605062 | 7093319 |
| 10043 | 16029 | 1117299 | 1916266 | 2714224 | 3610134 | 7129258 |
| 10045 | 16030 | 1127915 | 1934623 | 2730704 | 3624598 | 7135128 |
| 10046 | 16031 | 1177160 | 1985430 | 2735617 | 3655623 | 7407032 |
| 10052 | 16033 | 1245758 | 1995121 | 2822304 | 3662296 | 7994085 |
| 10054 | 16035 | 1253411 | 2018106 | 2833684 | 3672854 | 8083695 |
| 10057 | 16036 | 1258069 | 2033178 | 2872641 | 3699991 | 8191384 |
| 10058 | 16037 | 1266183 | 2051479 | 2903997 | 3707771 | 8263351 |
| 10059 | 16038 | 1302449 | 2101067 | 2917777 | 3732101 | 8692452 |
| 10063 | 16039 | 1320247 | 2106109 | 2930625 | 3809753 | 8834383 |
| 10068 | 16044 | 1359325 | 2107404 | 2991307 | 3813783 | 9221927 |
| 10069 | 16050 | 1404738 | 2136051 | 3004580 | 3845761 | 9578631 |
| 10070 | 16052 | 1408093 | 2140063 | 3086074 | 3884955 | 9578663 |
| 10076 | 16055 | 1411536 | 2208591 | 3103809 | 3889095 | 9640133 |
| 10079 | 16060 | 1419103 | 2249443 | 3107623 | 3902469 | 9750701 |
| 10082 | 16061 | 1435954 | 2266806 | 3157406 | 3912996 | 9783279 |
| 10088 | 16063 | 1494102 | 2268253 | 3163200 | 3930512 | 9887336 |
| 10092 | 16064 | 1517058 | 2275786 | 3212536 | 3972956 | 9922944 |
| 10099 | 20014 | 1562298 | 2310449 | 3224401 | 3993793 |         |
| 10100 | 20015 | 1567356 | 2377207 | 3233028 | 4048810 |         |
| 10102 | 20021 | 1581470 | 2411995 | 3239413 | 4053836 |         |
| 10110 | 21005 | 1638334 | 2443191 | 3243657 | 4079254 |         |
| 10112 | 21007 | 1662160 | 2488729 | 3248920 | 4084645 |         |
| 10114 | 21016 | 1686092 | 2493190 | 3262042 | 4125514 |         |
| 10117 | 21019 | 1686265 | 2498847 | 3269608 | 4136226 |         |
| 10122 | 21029 | 1689948 | 2511886 | 3277313 | 4154182 |         |
| 10123 | 21034 | 1692275 | 2528407 | 3306863 | 4164316 |         |
| 10125 | 21038 | 1700637 | 2535087 | 3308331 | 4265987 |         |
| 10128 | 25000 | 1737393 | 2538839 | 3320367 | 4383707 |         |
| 16004 | 25003 | 1779922 | 2554127 | 3348989 | 4921428 |         |
| 16006 | 25009 | 1794770 |         | 3349423 | 5575344 |         |

Subjects with ADHD:

|       |       |         |         |         |         |
|-------|-------|---------|---------|---------|---------|
| 10001 | 10096 | 25008   | 2026113 | 2984158 | 3983607 |
| 10002 | 10101 | 25012   | 2030383 | 2996531 | 4006710 |
| 10007 | 10104 | 25014   | 2031422 | 3119327 | 4028266 |
| 10011 | 10106 | 1019436 | 2054438 | 3124419 | 4053388 |
| 10012 | 10107 | 1023964 | 2081148 | 3154996 | 4055710 |
| 10013 | 10108 | 1038415 | 2107638 | 3160561 | 4060823 |
| 10017 | 10109 | 1057962 | 2141250 | 3169448 | 4073815 |
| 10019 | 10115 | 1094669 | 2174595 | 3170319 | 4075719 |
| 10020 | 10116 | 1099481 | 2196753 | 3174224 | 4091983 |
| 10022 | 10118 | 1133221 | 2207418 | 3194757 | 4095229 |
| 10026 | 10126 | 1159908 | 2228148 | 3205761 | 4095748 |
| 10028 | 10129 | 1186237 | 2230510 | 3235580 | 4116166 |
| 10029 | 20008 | 1187766 | 2260910 | 3291029 | 4154672 |
| 10030 | 20010 | 1201251 | 2276801 | 3313497 | 4187857 |
| 10032 | 21002 | 1208795 | 2297413 | 3349205 | 4221029 |
| 10033 | 21003 | 1240299 | 2306976 | 3378296 | 4241194 |
| 10035 | 21006 | 1282248 | 2380326 | 3390312 | 4275075 |
| 10037 | 21008 | 1283494 | 2380967 | 3407871 | 4334113 |
| 10040 | 21009 | 1341865 | 2497695 | 3433846 | 4362730 |
| 10041 | 21010 | 1356553 | 2505328 | 3441455 | 5150328 |
| 10042 | 21013 | 1399863 | 2524687 | 3446674 | 5164727 |
| 10047 | 21014 | 1471736 | 2529026 | 3457975 | 5193577 |
| 10048 | 21015 | 1497055 | 2570769 | 3504058 | 5971050 |
| 10050 | 21017 | 1511464 | 2599965 | 3519022 | 5993008 |
| 10051 | 21021 | 1517240 | 2601519 | 3520880 | 6383713 |
| 10056 | 21022 | 1561488 | 2628237 | 3542588 | 6453038 |
| 10060 | 21023 | 1623716 | 2682736 | 3559087 | 6500128 |
| 10061 | 21025 | 1628610 | 2697768 | 3561920 | 7253183 |
| 10062 | 21026 | 1643780 | 2737106 | 3601861 | 7390867 |
| 10064 | 21027 | 1740607 | 2741068 | 3653737 | 7591533 |
| 10071 | 21030 | 1771270 | 2773205 | 3672300 | 7689953 |
| 10073 | 21031 | 1780174 | 2780647 | 3679455 | 8009688 |
| 10074 | 21032 | 1784368 | 2821683 | 3691107 | 8278680 |
| 10075 | 21033 | 1791543 | 2854839 | 3712305 | 8337695 |
| 10078 | 21035 | 1809715 | 2884672 | 3767334 | 8463326 |
| 10081 | 21036 | 1843546 | 2897046 | 3803759 | 8697774 |
| 10085 | 21040 | 1883688 | 2907951 | 3827352 | 8915162 |
| 10086 | 21042 | 1918630 | 2910270 | 3834703 | 9002207 |
| 10087 | 21043 | 1947991 | 2919220 | 3856956 | 9190596 |
| 10090 | 21044 | 1996183 | 2940712 | 3870624 | 9210521 |
| 10091 | 21046 | 2014113 | 2950672 | 3910672 | 9326955 |
| 10095 | 25002 | 2024999 | 2950754 | 3976121 | 9907452 |

#### Supplementary Table 4

The following is a list of subjects that were omitted from the original sample of 504 youth, to create a sub-sample of 444 subjects that were additionally matched for motion. ID codes are listed as given in the ADHD-200 repository. There was no significant difference in motion, as calibrated by DVARS score, between the two groups ( $p=0.44$ ).

| Typically-Developing | ADHD    |
|----------------------|---------|
| 20021                | 10012   |
| 25009                | 10013   |
| 1050345              | 10028   |
| 1517058              | 10056   |
| 1686092              | 10061   |
| 1854691              | 10062   |
| 1879542              | 10074   |
| 1985430              | 10085   |
| 2033178              | 10096   |
| 2101067              | 10106   |
| 2268253              | 20008   |
| 2488729              | 20010   |
| 3224401              | 1019436 |
| 3233028              | 1099481 |
| 3277313              | 1283494 |
| 3306863              | 1471736 |
| 3308331              | 1628610 |
| 3605062              | 1780174 |
| 3624598              | 1809715 |
| 3655623              | 2014113 |
| 3732101              | 2081148 |
| 4048810              | 2174595 |
| 4136226              | 2682736 |
| 4383707              | 3170319 |
| 5575344              | 3390312 |
| 5600820              | 4362730 |
| 7135128              | 6453038 |
| 7407032              | 8009688 |
| 7994085              | 8337695 |
| 9783279              | 8915162 |

## Supplementary Table 5

44 individual brain networks identified from group ICA. Co-ordinates in Montreal Neurologic Space are displayed for the top 3 maxima for each network. For each co-ordinate set, peak intensities for the left brain are shown first, followed by right brain co-ordinates. The attribution of each network by domain and for each specific network are also listed.

| Domain        | Network Attribution                         | Number | Top 3 Positively-Correlated Intensities                                                      |
|---------------|---------------------------------------------|--------|----------------------------------------------------------------------------------------------|
| Task-Positive | Ventral Attention: ventral frontal          | 1      | (-3, 38, -10)/(3, 38, -10)<br>(-6, 41, -10)/(3, 35, -13)<br>(-9, 23, -13)/(3, 23, -13)       |
| Task-Positive | Dorsal Attention                            | 2      | (-12, -58, 65)/(9, -58, 65)<br>(-18, -55, 65)/(15, -61, 62)<br>(-9, -58, 62)/(9, -61, 62)    |
| Task-Positive | Orbitofrontal                               | 3      | (-42, 47, -13)/(45, 50, -13)<br>(-48, 29, -13)/(48, 35, -13)<br>(-33, 53, -16)/(21, 56, -13) |
| Task-Positive | Dorsomedial Prefrontal                      | 4      | (-12, 47, 53)/(36, 23, 56)<br>(-27, 23, 62)/(42, 26, 53)<br>(-3, 50, 47)/(0, 0, 0)           |
| Task-Positive | Cingulo-opercular: insula                   | 5      | (-39, 11, -1)/(42, 11, -4)<br>(-39, 17, -4)/(42, 17, -4)<br>(-45, 2, -4)/(48, 8, -7)         |
| Task-Positive | Dorsolateral prefrontal                     | 6      | (-30, 50, 23)/(30, 47, 23)<br>(-30, 53, 20)/(30, 47, 29)<br>(-3, 29, 32)/(3, 29, 32)         |
| Task-Positive | Frontopolar/dorsolateral prefrontal         | 7      | (-30, 56, 11)/(33, 62, 5)<br>(-27, 56, 8)/(30, 65, 8)<br>(-42, 50, 5)/(42, 59, 5)            |
| Task-Positive | Temporo-limbic                              | 8      | (-42, 14, -19)/(45, 14, -16)<br>(-42, 17, -16)/(39, 17, -16)<br>(-18, -1, -22)/(18, -1, -22) |
| Task-Positive | Left fronto-parietal control                | 9      | (-45, -67, 38)/(51, -55, 41)<br>(-48, -61, 35)/(51, -61, 35)<br>(-51, -61, 32)/(51, -52, 38) |
| Task-Positive | Cingulo-opercular: anterior cingulate       | 10     | (-36, 20, -4)/(36, 20, -7)<br>(-3, 23, 38)/(3, 26, 35)<br>(-3, 35, 29)/(6, 32, 29)           |
| Task-Positive | Ventral attention: temporoparietal junction | 11     | (-60, -52, 14)/(54, -46, 17)<br>(-60, -43, 26)/(54, -46, 23)<br>(0, 0, 0)/(57, -49, 23)      |
| Task-Positive | Right fronto-parietal control               | 12     | (0, 0, 0)/(30, 53, 2)<br>(0, 0, 0)/(27, 56, 2)<br>(0, 0, 0)/(39, 53, 5)                      |
| Default Mode  | Posterior: precuneus                        | 13     | (-3, -64, 50)/(3, -67, 59)<br>(-9, -67, 56)/(9, -67, 59)<br>(0, -46, 53)/(3, -46, 50)        |
| Default Mode  | Posterior: posterior cingulate              | 14     | (-3, -31, 35)/(3, -40, 26)<br>(-3, -43, 23)/(3, -43, 23)<br>(0, -28, 47)/(3, -25, 47)        |
| Default Mode  | Posterior: precuneus                        | 15     | (-6, -73, 35)/(6, -73, 38)<br>(-6, -70, 32)/(12, -70, 32)<br>(-3, -25, 29)/(3, -64, 26)      |
| Default Mode  | Anterior: medial prefrontal                 | 16     | (-3, 56, 29)/(6, 56, 29)<br>(-3, 50, 26)/(3, 50, 26)<br>(-6, 44, 17)/(3, 47, 11)             |
| Default Mode  | Posterior: posterior cingulate/precuneus    | 17     | (-3, -61, 26)/(6, -52, 29)<br>(-3, -55, 32)/(3, -55, 32)<br>(-6, -61, 23)/(6, -52, 23)       |

|                      |                                                |    |                                                                                                    |
|----------------------|------------------------------------------------|----|----------------------------------------------------------------------------------------------------|
| Default Mode         | Anterior: medial prefrontal/anterior cingulate | 18 | (-3, 50, 2)/(3, 50, 2)<br>(-3, 53, 5)/(3, 53, 5)<br>(-6, 59, 2)/(6, 59, 2)                         |
| Default Mode         | Posterior: posterior cingulate                 | 19 | (0, 0, 0)/(48, -67, 35)<br>(-42, -70, 38)/(51, -67, 38)<br>(0, 0, 0)/(51, -58, 32)                 |
| Subcortical          | Cerebellum                                     | 20 | (-6, -46, -19)/(9, -46, -19)<br>(-9, -49, -19)/(12, -46, -22)<br>(-6, -58, -19)/(12, -55, -19)     |
| Subcortical          | Cortico-cerebellar                             | 21 | (-15, -85, -31)/(36, -76, -31)<br>(-27, -82, -37)/(39, -76, -34)<br>(-24, -82, -34)/(36, -79, -34) |
| Subcortical          | Basal Ganglia-Thalamic                         | 22 | (-18, 8, -1)/(21, 8, 2)<br>(-24, 2, -13)/(27, -4, -13)<br>(-18, 5, -13)/(21, 5, -13)               |
| Subcortical          | Striato-cerebellar                             | 23 | (-12, -61, -52)/(12, -64, -52)<br>(-15, -58, -52)/(12, -61, -49)<br>(0, 0, 0)/(15, -73, -43)       |
| Visual               | Visual                                         | 24 | (-3, -85, 2)/(3, -85, 2)<br>(-3, -88, -1)/(3, -88, -1)<br>(-9, -70, 8)/(6, -70, 8)                 |
| Visual               | Visual                                         | 25 | (-6, -88, 26)/(3, -82, 29)<br>(0, -76, 26)/(3, -76, 23)<br>(-21, -94, 17)/(15, -94, 14)            |
| Visual               | Visual                                         | 26 | (-36, -82, 26)/(39, -79, 26)<br>(-33, -79, 32)/(36, -76, 32)<br>(-30, -79, 35)/(33, -73, 35)       |
| Visual               | Visual                                         | 27 | (-21, -100, 2)/(33, -94, -1)<br>(-18, -100, -1)/(27, -100, -4)<br>(-24, -97, -10)/(27, -100, -10)  |
| Visual               | Visual                                         | 28 | (0, 0, 0)/(36, -82, -10)<br>(0, 0, 0)/(33, -82, -13)<br>(0, 0, 0)/(27, -85, -19)                   |
| Visual               | Visual                                         | 29 | (-24, -64, -10)/(27, -73, -13)<br>(-27, -61, -13)/(24, -70, -13)<br>(-27, -58, -10)/(24, -49, -13) |
| Sensorimotor         | Sensorimotor: lower limb                       | 30 | (0, -22, 56)/(3, -19, 62)<br>(-21, -31, 68)/(21, -31, 68)<br>(-18, -34, 68)/(18, -28, 68)          |
| Sensorimotor         | Gesture: fusiform face area, motor cortex      | 31 | (-3, -19, 71)/(3, -13, 71)<br>(-3, -43, 71)/(3, -37, 71)<br>(-3, -49, 68)/(6, -46, 71)             |
| Sensorimotor         | Left primary sensorimotor                      | 32 | (-45, -31, 53)/(45, -28, 53)<br>(-42, -34, 47)/(0, 0, 0)<br>(-33, -34, 62)/(0, 0, 0)               |
| Sensorimotor         | Right primary sensorimotor                     | 33 | (-45, -31, 56)/(51, -19, 50)<br>(-36, -31, 62)/(36, -31, 59)<br>(0, 0, 0)/(33, -31, 50)            |
| Sensorimotor         | Supplementary sensorimotor area                | 34 | (0, 8, 50)/(3, 8, 47)<br>(0, 5, 53)/(3, 8, 53)<br>(-3, 11, 44)/(6, 8, 44)                          |
| Sensorimotor         | Somatosensory-tactile                          | 35 | (-51, -31, 44)/(60, -19, 35)<br>(-60, -28, 35)/(60, -25, 35)<br>(-60, -22, 41)/(57, -19, 38)       |
| Cognitive Processing | Primary speech                                 | 36 | (-54, -10, 32)/(54, -7, 35)<br>(-60, -10, 17)/(60, -10, 17)<br>(-60, -13, 14)/(63, -10, 14)        |
| Cognitive Processing | Auditory                                       | 37 | (-45, -16, 8)/(48, -22, 14)<br>(-48, -16, 11)/(51, -16, 11)<br>(-48, -22, 11)/(48, -19, 11)        |

|                      |                                                       |    |                                                                                              |
|----------------------|-------------------------------------------------------|----|----------------------------------------------------------------------------------------------|
| Cognitive Processing | Memory, perceptual: retrosplenial and parahippocampal | 38 | (-3, -67, 14)/(12, -55, 5)<br>(-6, -67, 17)/(9, -64, 17)<br>(-9, -61, 5)/(3, -73, 14)        |
| Cognitive Processing | Language comprehension                                | 39 | (-45, 23, -7)/(0, 0, 0)<br>(-48, 17, -10)/(0, 0, 0)<br>(-51, 17, 8)/(0, 0, 0)                |
| Cognitive Processing | Speech comprehension                                  | 40 | (-57, -13, -10)/(54, -7, -13)<br>(-51, 5, -13)/(51, 11, -19)<br>(0, 0, 0)/(60, -7, -19)      |
| Cognitive Processing | Episodic memory: hippocampal/temporo- limbic          | 41 | (-21, -4, -25)/(24, -1, -25)<br>(-18, -4, -22)/(24, -4, -28)<br>(-24, -7, -25)/(30, -7, -25) |
| Cognitive Processing | Fusiform face area, bilateral                         | 42 | (-48, -67, 8)/(51, -64, -1)<br>(-48, -70, 5)/(51, -64, -7)<br>(-45, -67, -1)/(48, -67, -1)   |
| Cognitive Processing | Spatial attention, calculation                        | 43 | (-24, -67, 47)/(30, -61, 50)<br>(-36, -55, 53)/(33, -61, 47)<br>(-24, -64, 50)/(27, -61, 53) |
| Cognitive Processing | Semantic processing, reading                          | 44 | (-48, 32, 17)/(54, 32, 23)<br>(-45, 32, 14)/(54, 29, 20)<br>(-42, 2, 38)/(0, 0, 0)           |



## Supplementary Table 6

16 components were discarded after sorting of the 60 components from the group spatial ICA. Representative image slices are displayed for each of the discarded components along with possible functional attributions.

| Representative Image Slice                                                          | #  | Suggested attribution | Representative Image Slice                                                          | #  | Suggested attribution          |
|-------------------------------------------------------------------------------------|----|-----------------------|-------------------------------------------------------------------------------------|----|--------------------------------|
| 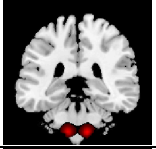   | 45 | Brainstem pulsation   |    | 53 | Vascular                       |
|    | 46 | Brainstem pulsation   |    | 54 | Ventricles                     |
|    | 47 | Vascular              |    | 55 | Ventricles                     |
|   | 48 | Brainstem pulsation   |   | 56 | Motion                         |
|  | 49 | Vascular              |  | 57 | Vascular                       |
|  | 50 | Ventricles            |  | 58 | Vascular                       |
|  | 51 | Ventricles            |  | 59 | Ventricles/motion              |
|  | 52 | Brainstem pulsation   |  | 60 | Ventricles/brainstem pulsation |

## Supplementary Figure 1

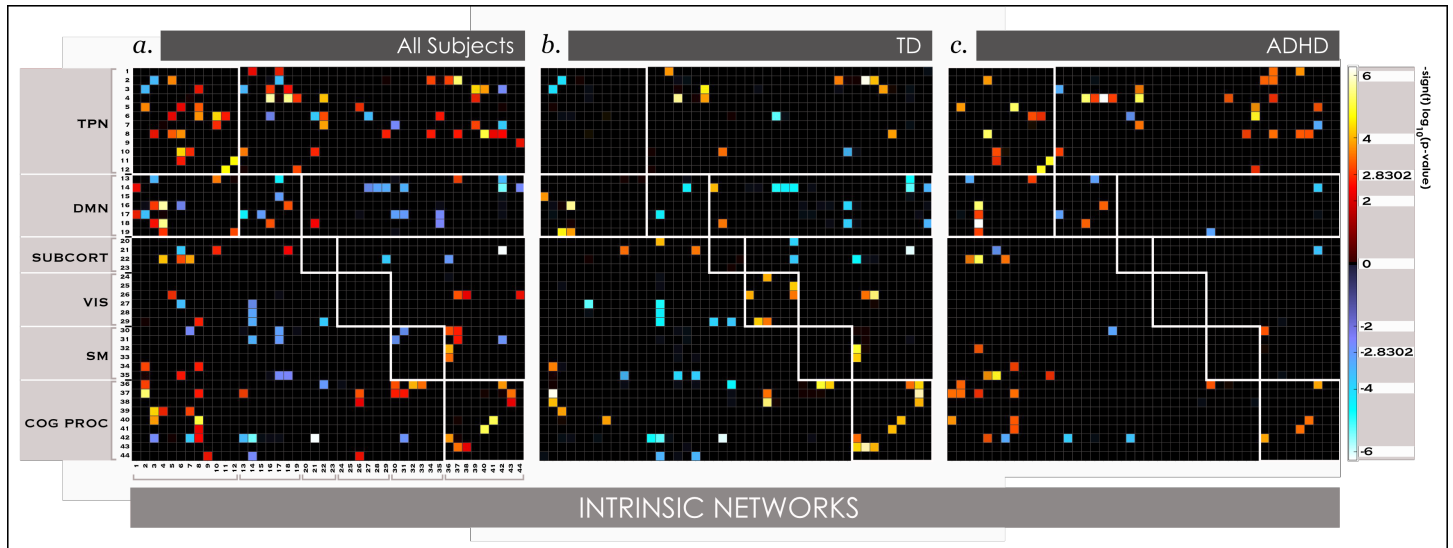

Age effects in static connectivity in 222 subjects with TD and 222 with ADHD ages 7-17 was determined by computing Pearson pairwise correlations averaged across fMRI timecourses among 44 INs obtained from ICA. These subjects were part of a subsample created that was matched for motion, as defined by DVARS. In **a**, significant ( $\alpha < 0.01$  corrected for FDR) age effects are displayed for all 444 subjects, where **b** and **c** show significant ( $\alpha < 0.05$ , corrected for FDR) age effects for TD and ADHD youth, respectively.

## Supplementary Figure 2

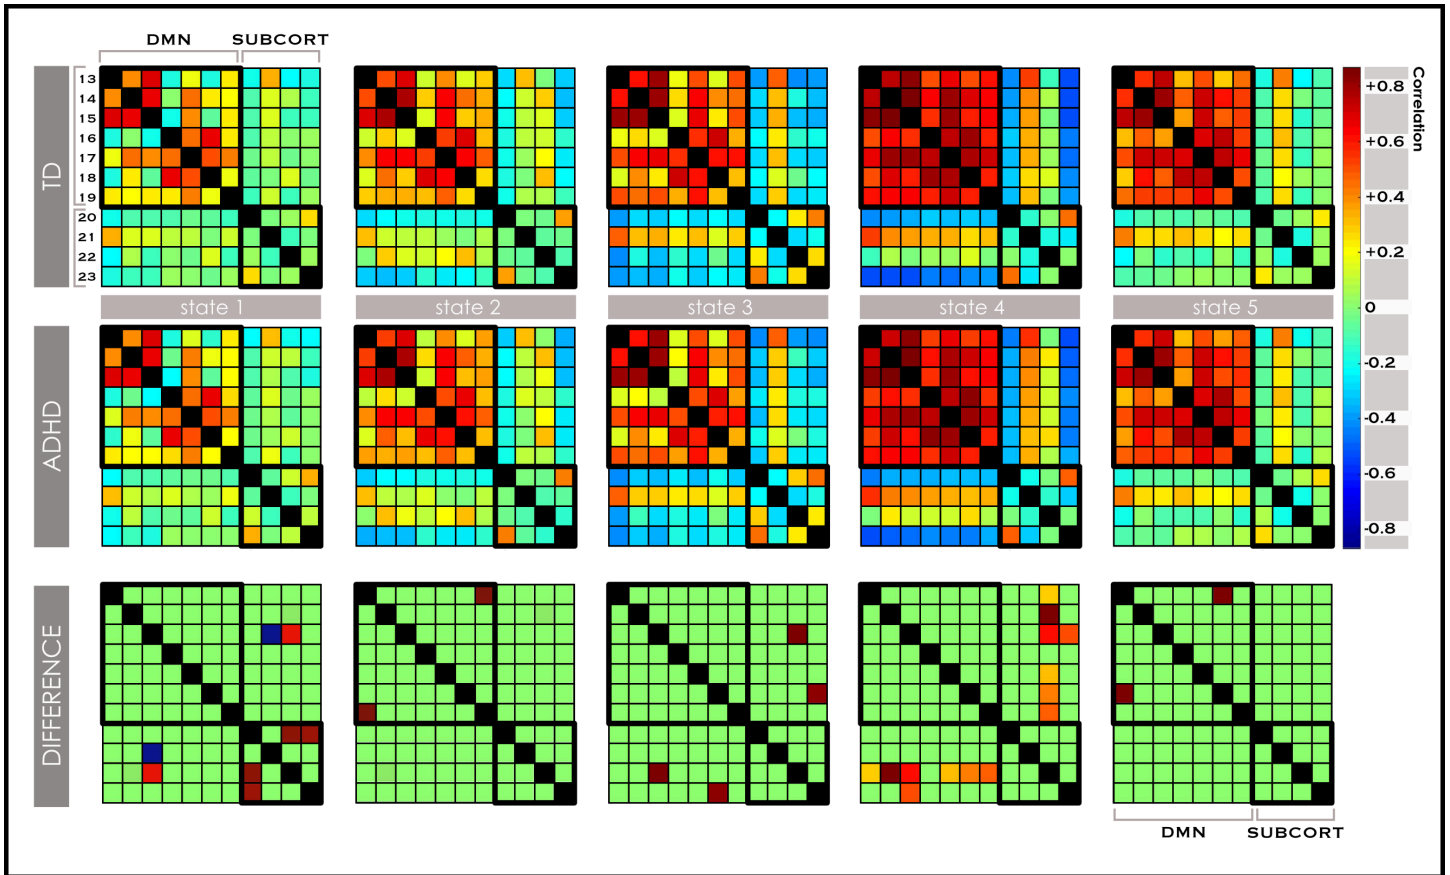

Dynamic functional connectivity across 5 brain states was estimated with k-means clustering of windowed FNC from the ICA timecourses in local intrinsic connectivity between DMN and subcortical networks for a subsample of 444 youth that were additionally matched for motion, defined by DVARS. Significant FNC differences between any combination of intrinsic network systems were examined with 2-sample t-tests at a significant level of  $\alpha < 0.05$ , corrected for false discovery rate.

### Supplementary Figure 3

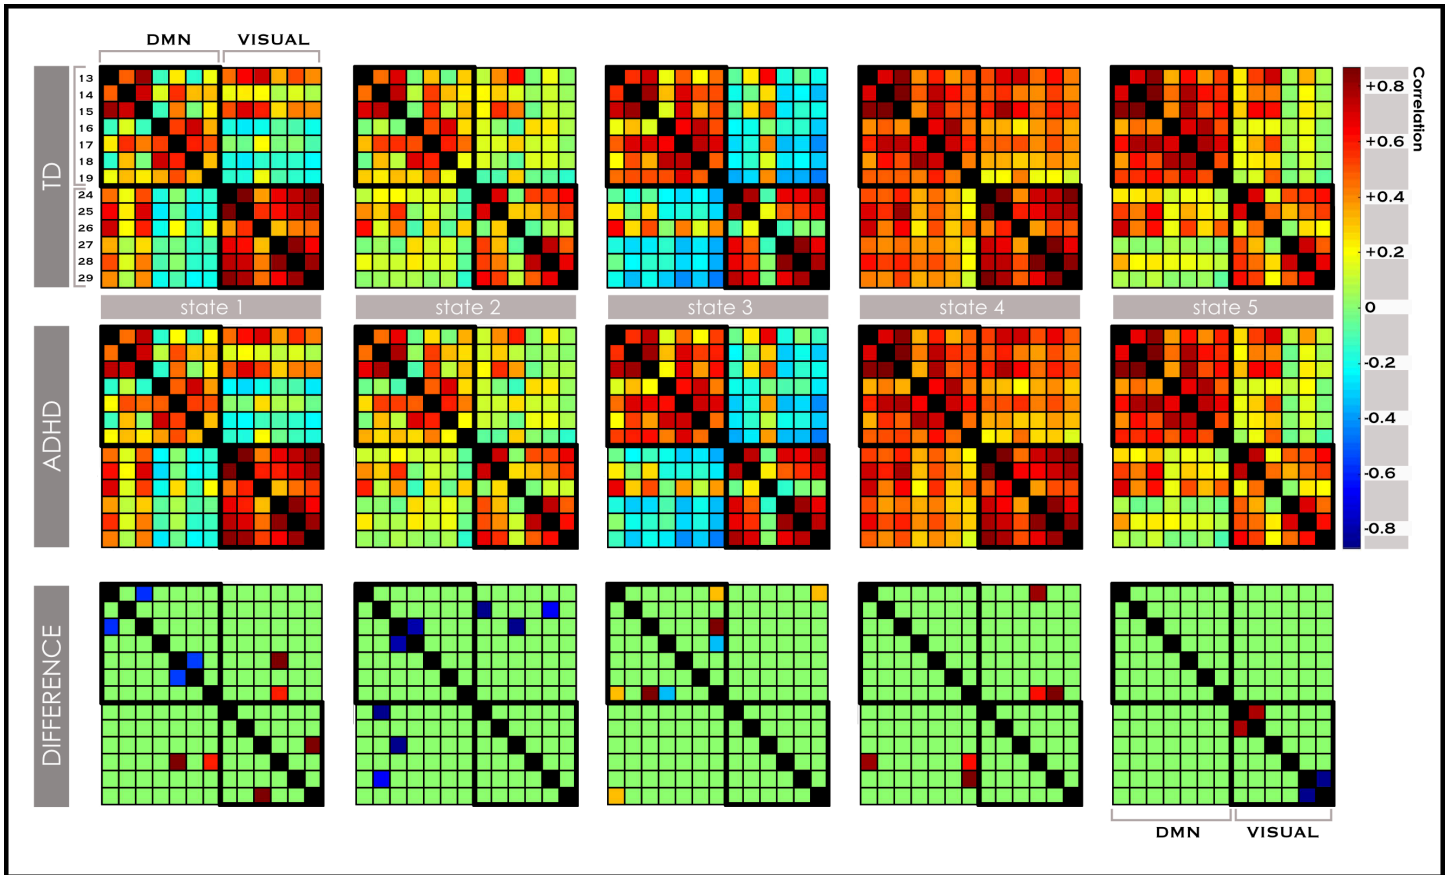

Dynamic functional connectivity across 5 brain states was estimated with k-means clustering of windowed FNC from the ICA timecourses in local intrinsic connectivity between DMN and visual networks for a subsample of 444 youth that were additionally matched for motion, defined by DVARS. Significant FNC differences between any combination of intrinsic network systems were examined with 2-sample t-tests at a significant level of  $\alpha < 0.05$ , corrected for false discovery rate.

## Supplementary Figure 4

The number of clusters (states) in the dynamic connectivity analysis was determined using the Elbow Criterion and Bayes Information Criterion, log-likelihood method. Scree plots are displayed below for these computations on windowed FNC matrices including variance attributable to age for a) Elbow criterion and b) BIC, and after variance attributable to age was removed using the general linear model for c) Elbow criterion and d) BIC.

a)

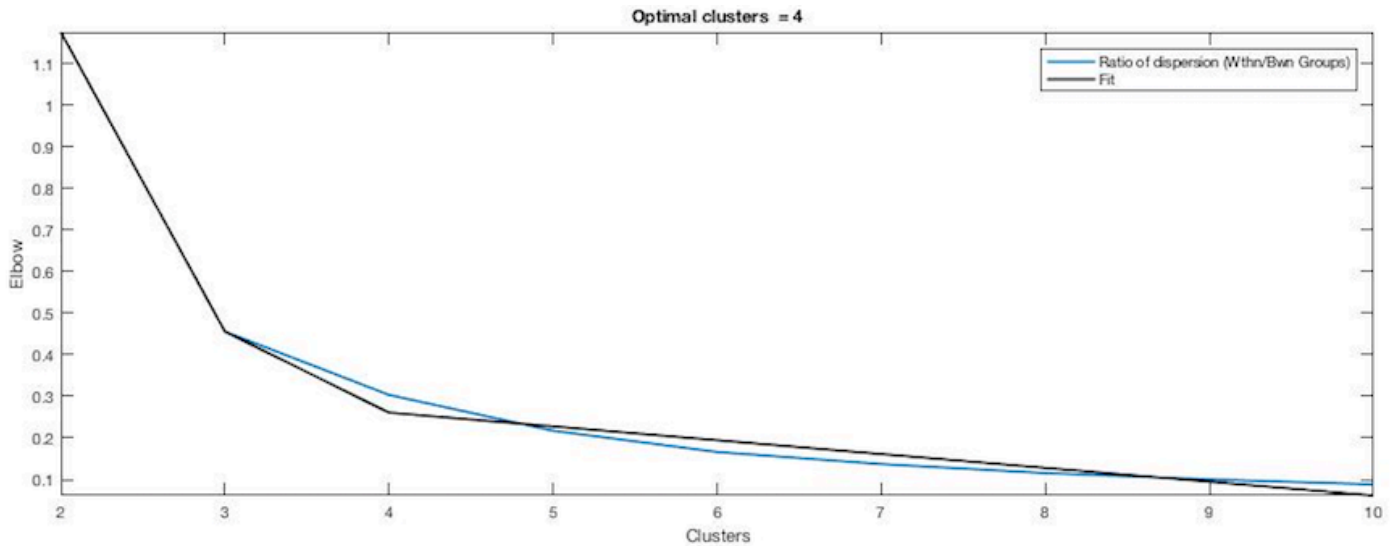

b)

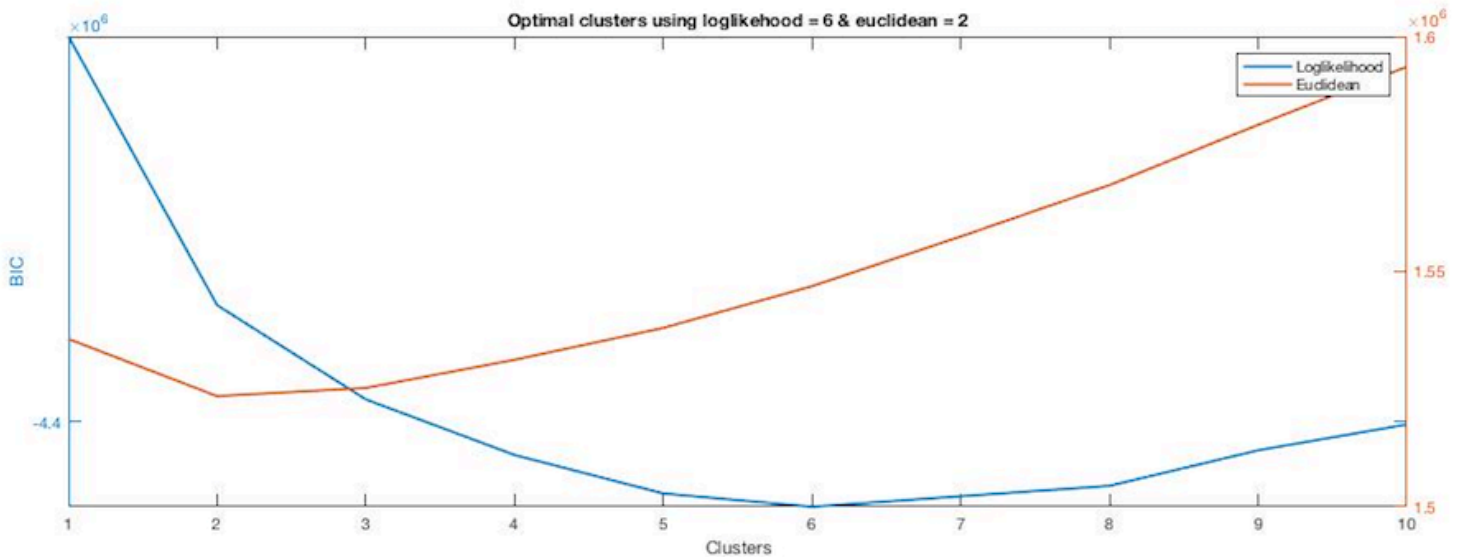

c)

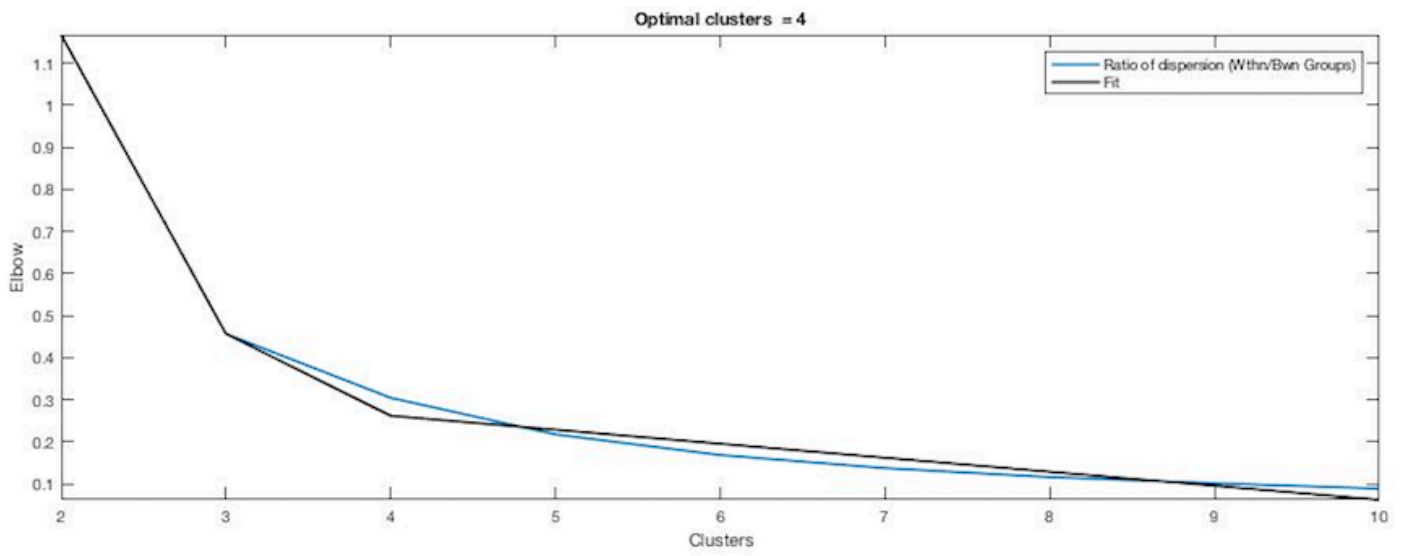

d)

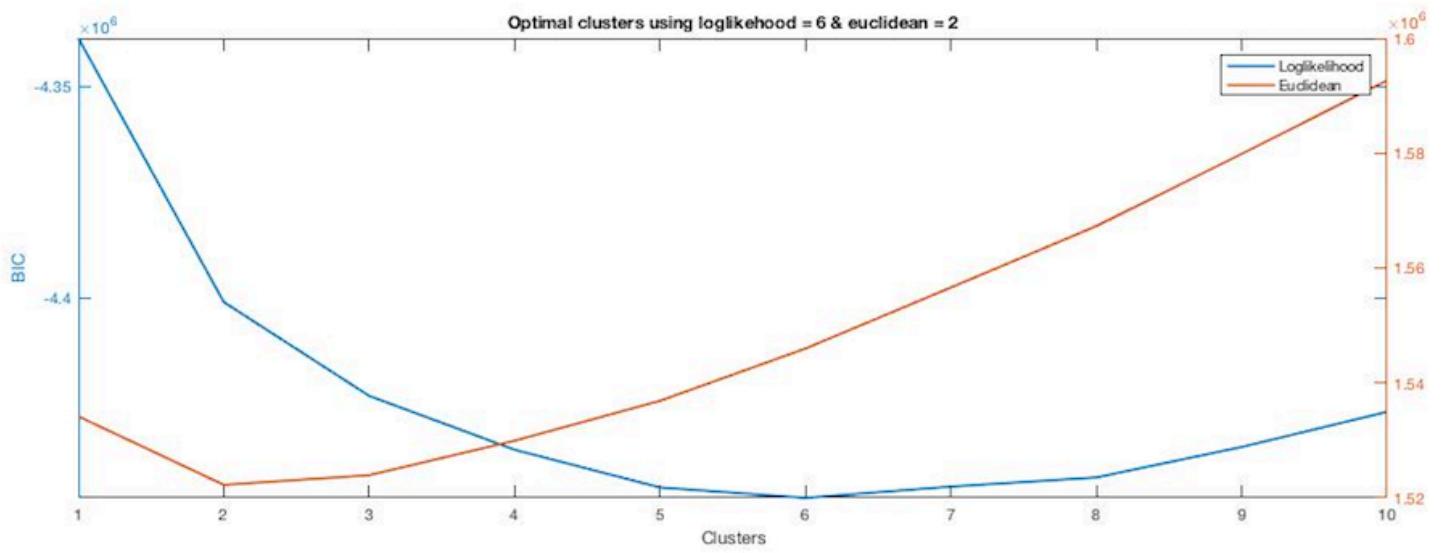

Supplement: netn-03-195-s001.pdf [file netn-03-195-s001.pdf]
